# Supplementary material
Source: PubMed Central journal article supplement (PMC2799990)
Supplement: HJFOA5-000003-000282_1-S1.pdf [file HJFOA5-000003-000282_1-S1.pdf]

## SUPPLEMENTAL INFORMATION

### **Pseudopodia perpendicular to the surface of deformed spherical bodies.**

The cell is not a perfect circular body. Here we illustrate how deviations from a circle affect the angle of pseudopodia that are extended still perpendicular to that body. Assume a circle with deviations in the form of a wave. The position of the body is given in the polar coordinate system  $(r, \theta)$  by

$$r(\theta) = a + b\cos(\theta/n) \quad (1)$$

where  $a$  is the radius of the circle,  $b$  is the amplitude of the wave, and  $n$  is the number waves on the circumference of the circle. To present the body in the Cartesian coordinate system  $(x, y)$ , we calculated the  $x, y$  values, according to

$$\begin{aligned} x(\theta) &= r\cos\theta = [a + b\cos(\theta/n)]\cos\theta \quad \text{and} \\ y(\theta) &= r\sin\theta = [a + b\cos(\theta/n)]\sin\theta \end{aligned} \quad (2)$$

Figure S1A shows the bodies for the unit circle ( $a = 1$ ) with  $b = 0.2$  and different values of the number of waves  $n$ , as well as with a mixture of waves ( $n = 2$  to  $5$ ).

We calculated the tangents at these bodies, as well as the angle  $\alpha$  to the left of the “pseudopod” perpendicular to these tangents. Figure S1B shows the cosine of this “pseudopod” angle, which in the research field of chemotaxis is called chemotaxis index ( $\cos\alpha = CI$ ). The results show that pseudopodia extended at the front of the cell closest to the gradient have  $CI = 1$ . Pseudopodia extended more to the rear of the cell have a lower  $CI$ , which for a circle is linear with  $x$ -distance from the front. In bodies with a wave-like boundary, the chemotaxis index just behind the front declines faster than in a perfect circle.

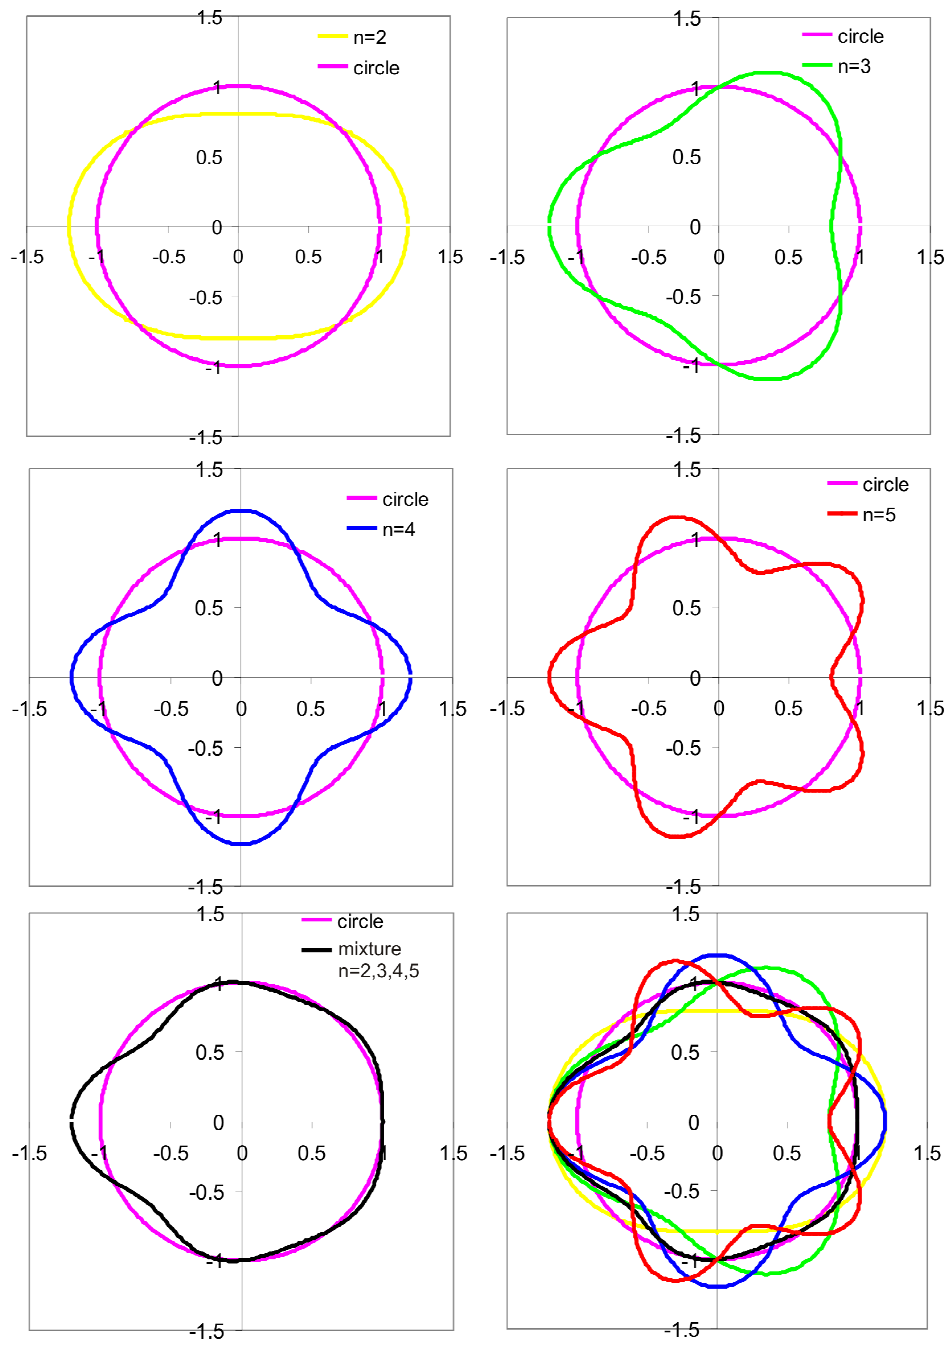

Figure S1A. Bodies of the unit circle with waves on the surface;  $n$  is the number of waves, which have an amplitude of  $b = 0.2$ , compared to the radius of the circle ( $a = 1$ ). The “front” of the cell is at the left side.

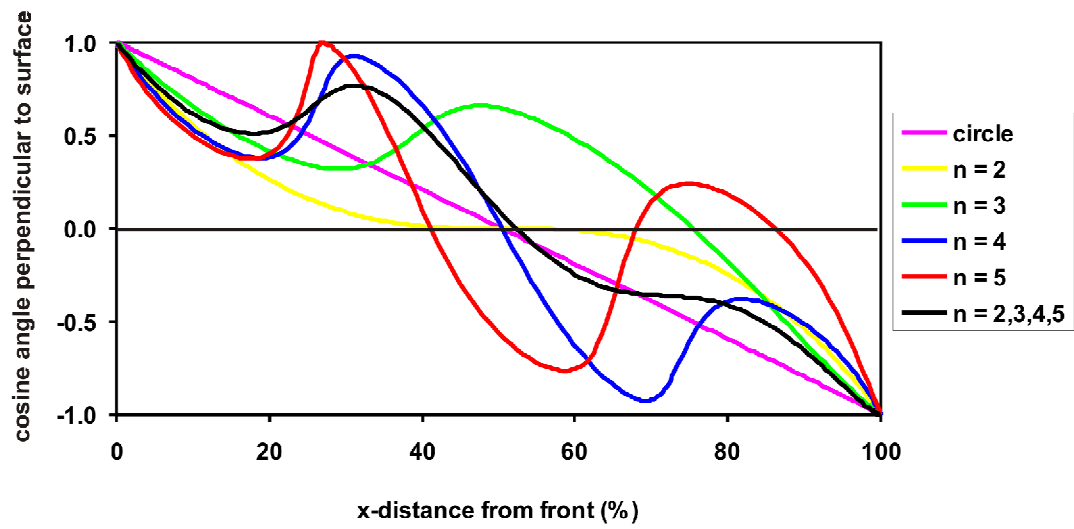

Figure S1B. The angle perpendicular to the surface of the bodies was calculated at different x-distances from the “front”, which is at the left side. The cosine of this angle is presented, and is identical to the often used chemotaxis index (CI).
